# Supplementary material
Source: PubMed Central journal article supplement (PMC6800827)

# Supplementary Figure 1

## A. Isoflurane Concentration

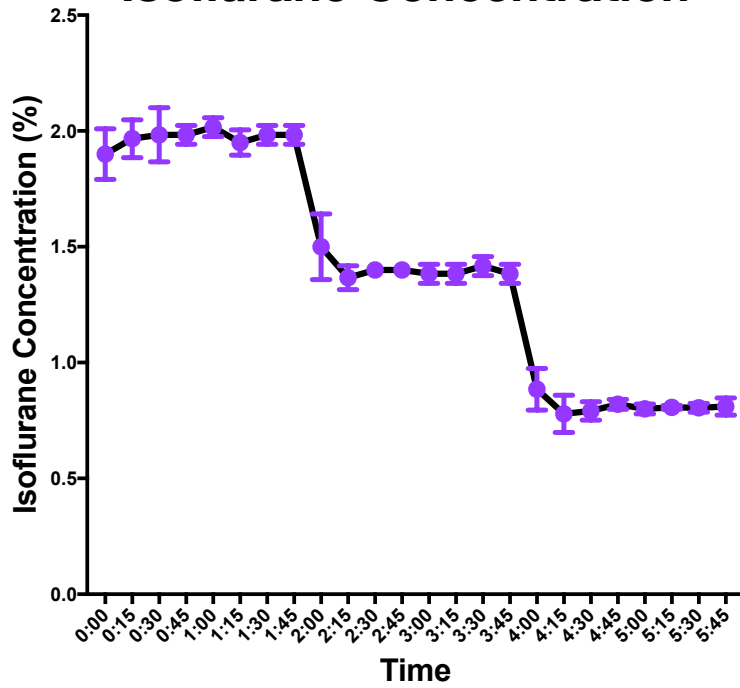

## B. Oxygen Concentration

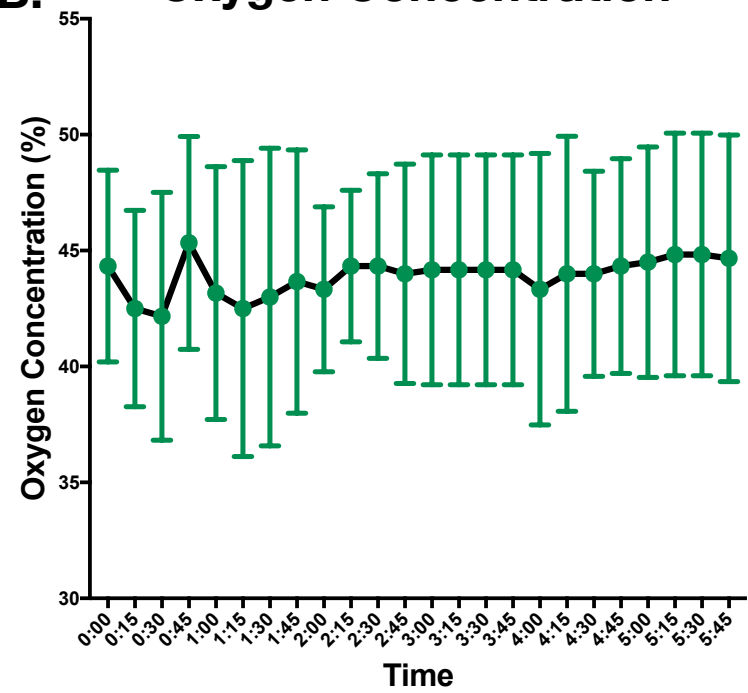

## C. Temperature

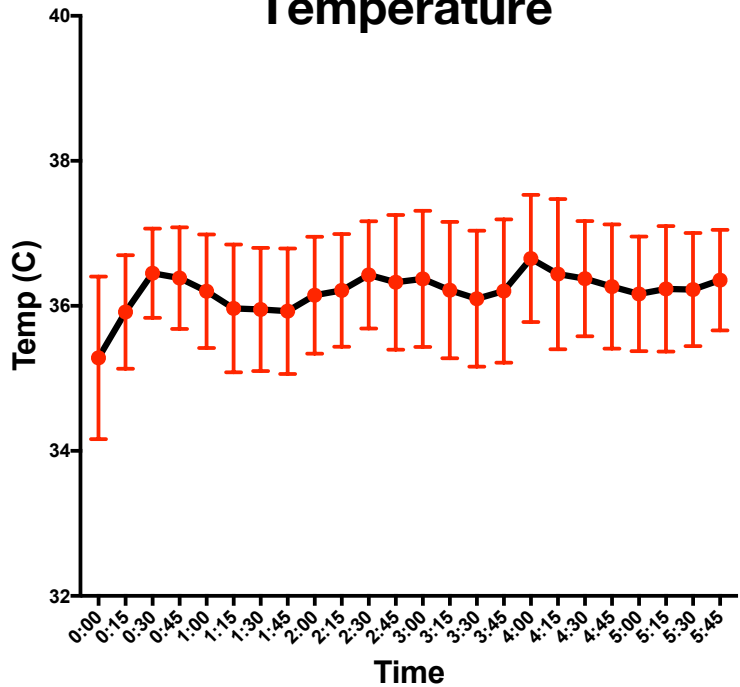

## D. CO<sub>2</sub> Concentration

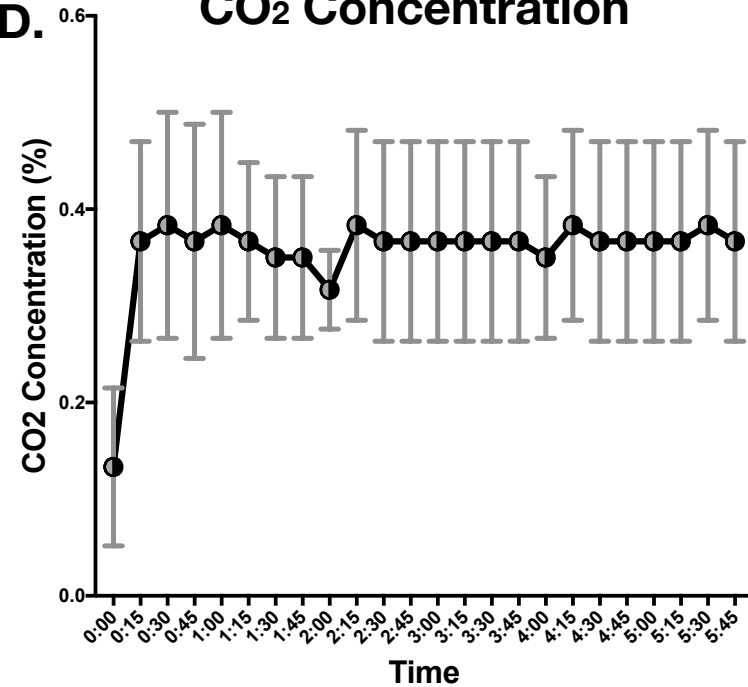

Supplement: NIHMS1050962-supplement-1.pdf [file NIHMS1050962-supplement-1.pdf]
